# Supplementary material for: Psychometric Properties of the Digital Trail Making Test and Symbol Digit Modalities Test among People with Post-COVID-19 Conditions and Healthy Controls: Implications for Pilot Screening and Flight Safety
Source: Research Square preprint supplement (doi:10.21203/rs.3.rs-5933877/v1), 2025-05-06
Supplement: Supplementary file 1 [file 4187e5c2b27711465b91f248.docx]

**Supplementary file 1: Survey questionnaire utilised for the study (customised from the COVID-19 Yorkshire Rehabilitation Scale and Symptom Burden Questionnaire for Long COVID)**

The purpose of this questionnaire is mainly to assess your current neuropsychological and functional ability following COVID-19 infection. Your responses will be recorded. We will use this information to assess post-COVID-19 neurocognitive dysfunction, and then quick neurocognitive screening tests (Trail Making Test and Symbol Digit Modalities Test) will be administered. This questionnaire will take around 5-10 minutes. If there are any topics, you do not want to talk about you can choose not to respond.
Note that this information will be used for **research purposes only**, and the data collected will **not be used for diagnostic or clinical purposes**.

**PART I. SOCIO-DEMOGRAPHIC DETAILS**

1. Communication/survey code:

2. Age___________________________________________________________

3. Gender

- Male
- Female
- Prefer not to say
- Another gender (please specify) ________________________________

4. Years of education (number of academic years you have completed or formal education programme)

- < 7
- 7-11
- 12
- 13-15
- 16
- >= 17

1. Ethnicity

NZ European

Māori

Pacific Peoples

Asian

European other

Middle Eastern/Latin American/African

Prefer not to say

others (specify) __________________________________________________

1. Employment status

Employed full-time

Employed part-time

Unemployed looking for work

Unemployed not looking for work

Retired

Student

Unable to work/Disabled

Others (specify) __________________________________________________

1. History of hospital admission for COVID-19 infection and/or Long COVID

No

Yes

1. Marital status

Married

Widowed

Divorced

Separated

Single

Engaged

Prefer not to say

Others (specify) __________________________________________________

9. Average annual income

1. Less than $20,000
2. $20,000 - $39,999
3. $40,000 - $59,999
4. $60,000 - $79,999
5. $80,000 - $99,999
6. $100,000 - $119,999
7. More than $120,000

10. Date ________________________________________________________________

**PART II. SIGNS AND SYMPTOMS OF LONG COVID SEVERITY SCORE**
Please answer the following questions to the best of your knowledge: 
**“Now”** refers to how you feel now/this week (last 7 days). 
**“Pre-COVID-19”** refers to how you were feeling prior to contracting the illness (COVID-19).
Rate the severity of each problem on a scale of **0-3**: 
**0 = None; no problem**
**1 = Mild problem; does not affect daily life**
**2 = Moderate problem; affects daily life to a certain extent**
**3 = Severe problem; affects all aspects of daily life; life-disturbing**

**A. Fatigue**

|  | Now | | | | Pre-COVID-19 | | | |
| --- | --- | --- | --- | --- | --- | --- | --- | --- |
|  | 0 (No problem) | 1 (Mild problem) | 2 (Moderate problem) | 3 (Severe problem) | 0 (No problem) | 1 (Mild problem) | 2 (Moderate problem) | 3 (Severe problem) |
| Physical/mental exhaustion |  |  |  |  |  |  |  |  |
| Low energy |  |  |  |  |  |  |  |  |
| Tiredness (need for sleep) |  |  |  |  |  |  |  |  |
| Post-exertional malaise (worsening of symptoms after physical, cognitive, and emotional exertion) |  |  |  |  |  |  |  |  |

**B. Neurocognition**

|  | Now | | | | Pre-COVID-19 | | | |
| --- | --- | --- | --- | --- | --- | --- | --- | --- |
|  | 0 (No problem) | 1 (Mild problem) | 2 (Moderate problem) | 3 (Severe problem) | 0 (No problem) | 1 (Mild problem) | 2 (Moderate problem) | 3 (Severe problem) |
| Problems with attention/concentration |  |  |  |  |  |  |  |  |
| Problems with memory/difficulty remembering/ recalling |  |  |  |  |  |  |  |  |
| Problems with thinking, organizing, or/ and planning |  |  |  |  |  |  |  |  |
| Problems with sequencing |  |  |  |  |  |  |  |  |
| Problems with multi-tasking |  |  |  |  |  |  |  |  |
| Difficulty with decision-making |  |  |  |  |  |  |  |  |
| Slower information processing |  |  |  |  |  |  |  |  |

**C. Mental health and wellbeing**

|  | Now | | | | Pre-COVID-19 | | | |
| --- | --- | --- | --- | --- | --- | --- | --- | --- |
|  | 0 (No problem) | 1 (Mild problem) | 2 (Moderate problem) | 3 (Severe problem) | 0 (No problem) | 1 (Mild problem) | 2 (Moderate problem) | 3 (Severe problem) |
| Feeling anxious |  |  |  |  |  |  |  |  |
| Feeling depressed |  |  |  |  |  |  |  |  |
| Falling asleep |  |  |  |  |  |  |  |  |
| Staying asleep |  |  |  |  |  |  |  |  |
| Oversleeping |  |  |  |  |  |  |  |  |
| Sleep short and or interrupted |  |  |  |  |  |  |  |  |

**PART III. FUNCTIONAL ABILITY SCORE**

Please answer the following questions to the best of your knowledge: 
**“Now”** refers to how you feel now/this week (last 7 days). 
**“Pre-COVID-19”** refers to how you were feeling prior to contracting the illness (COVID-19).
Rate the severity of each problem on a scale of **0-3**: 
**0 = None; no problem**
**1 = Mild problem; does not affect daily life**
**2 = Moderate problem; affects daily life to a certain extent**
**3 = Severe problem; affects all aspects of daily life; life-disturbing**

|  | Now | | | | Pre-COVID-19 | | | |
| --- | --- | --- | --- | --- | --- | --- | --- | --- |
|  | 0 (No problem) | 1 (Mild problem) | 2 (Moderate problem) | 3 (Severe problem | 0 (No problem) | 1 (Mild problem) | 2 (Moderate problem) | 3 (Severe problem) |
| 1. Communication: Difficulty with communication/word finding difficulty/difficulty in understanding others |  |  |  |  |  |  |  |  |
| 2. Walking or moving around: Difficulties with walking or moving around |  |  |  |  |  |  |  |  |
| 3. Personal care: Difficulties with personal tasks such as using the toilet or getting washed and dressed |  |  |  |  |  |  |  |  |
| 4. Other activities of daily living: Difficulty doing wider activities such as household work, leisure/sporting activities, paid/unpaid work, study or shopping |  |  |  |  |  |  |  |  |
| 5. Social role: Problems with socialising/interacting with friends* or caring for dependants *Related to your illness and not due to other concerns. |  |  |  |  |  |  |  |  |

**PART IV. EMPLOYMENT**

1. Has your COVID-19 illness affected your work?

1. No change
2. On reduced working hours
3. On sickness leave
4. Changes made to role/working arrangements (such as working from home or lighter duties
5. Had to retire/change job
6. Lost job

**PART V.** **OVERALL HEALTH IMPACT OF COVID-19**

Are there any other comments you would like to make about the overall health impact of COVID-19? Please?

________________________________________________________________

**Thank you for your time spent completing this survey. The next step will be to undertake two online neurocognitive screening tests, the Trail Making Test and the Symbol Digit Modalities Test, each taking only a few minutes. Before that, we will send you a manual which has test instructions, some demonstrations, etc. Please note that a larger screen size device such as Windows (laptop/desktop) or Tablet is needed to undertake the tests, specifically to avoid screen size limitations. The tests also require up-to-date browser software (i.e. any browser updated in the past 5-7 years).**
